# Supplementary material
Source: PubMed Central journal article supplement (PMC7464789)

**A**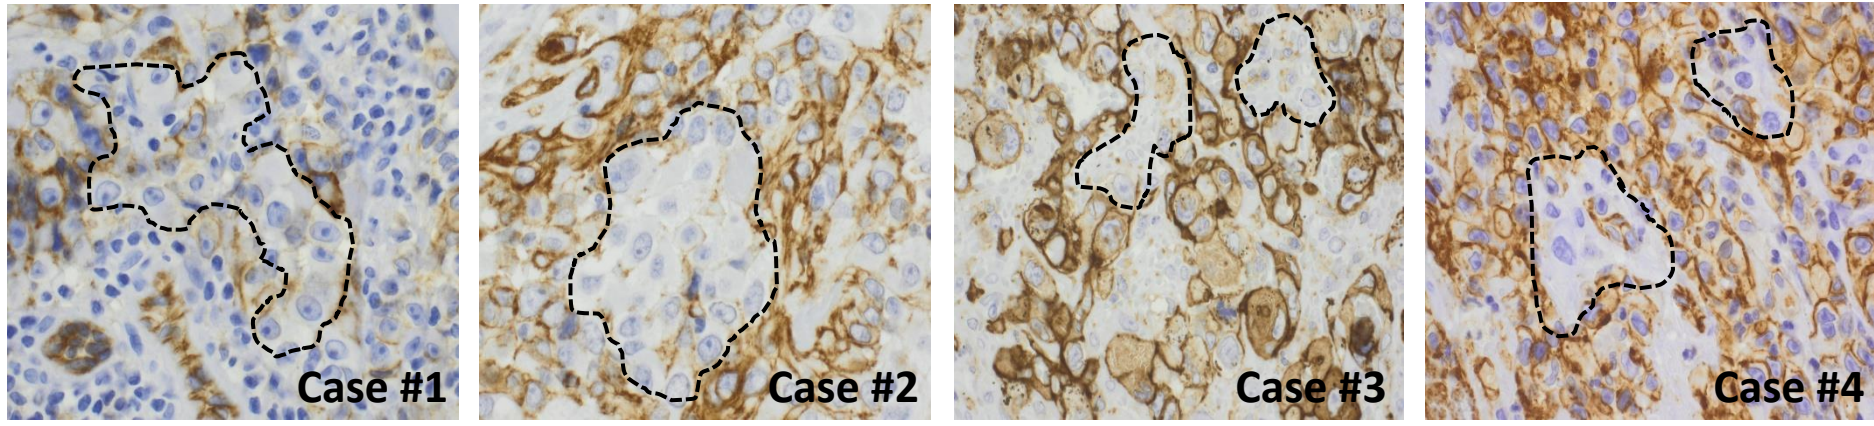**B**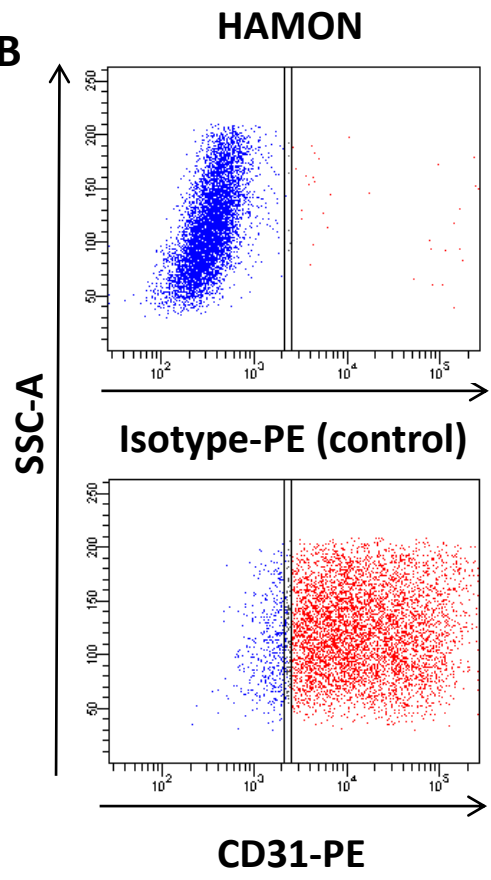**C**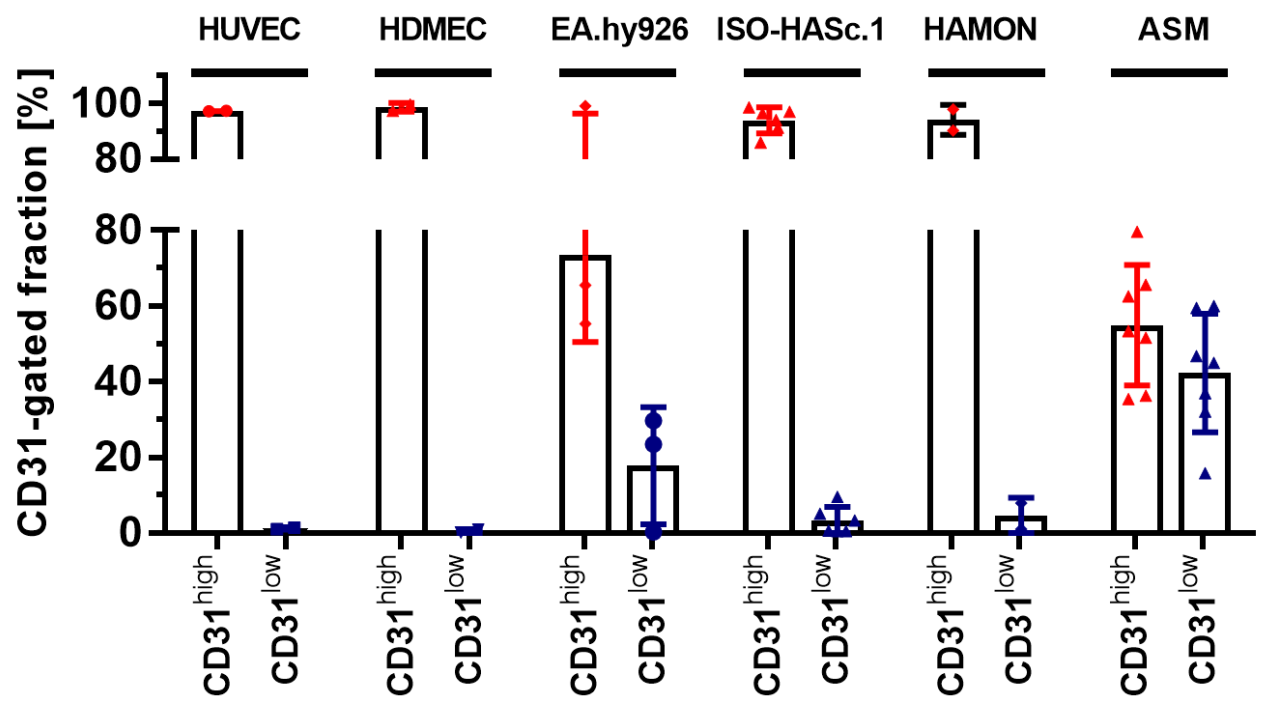

Supplemental Fig. 1

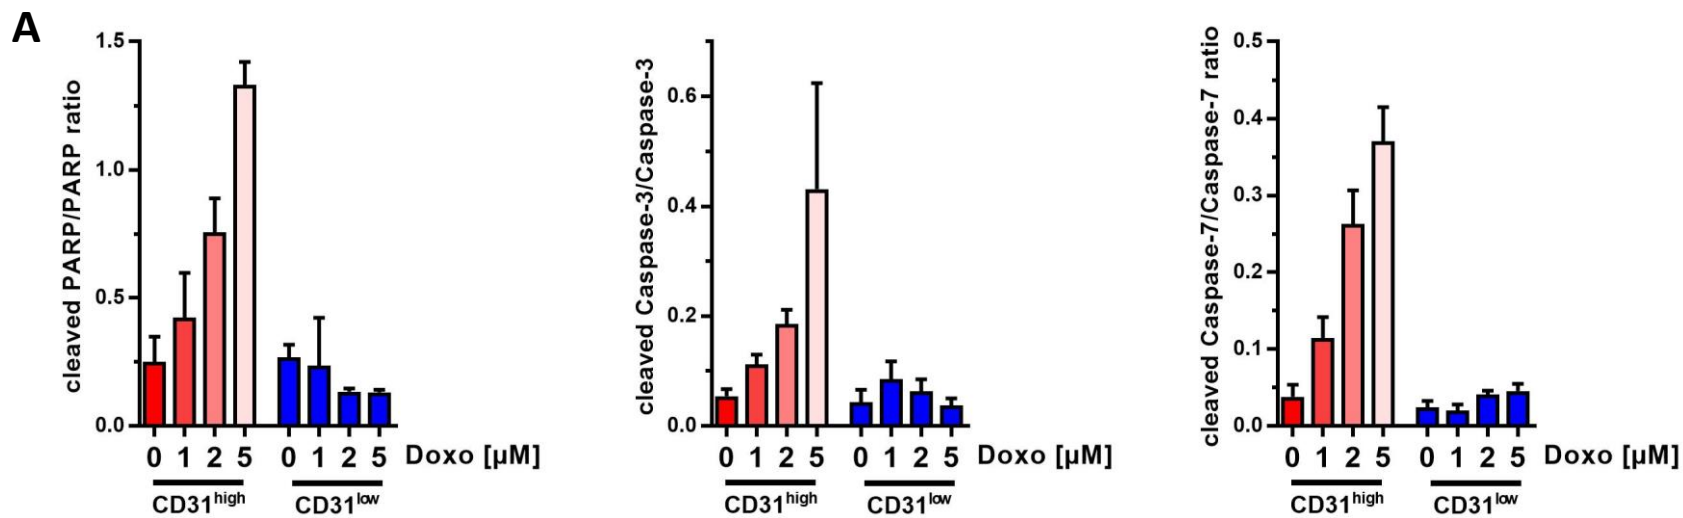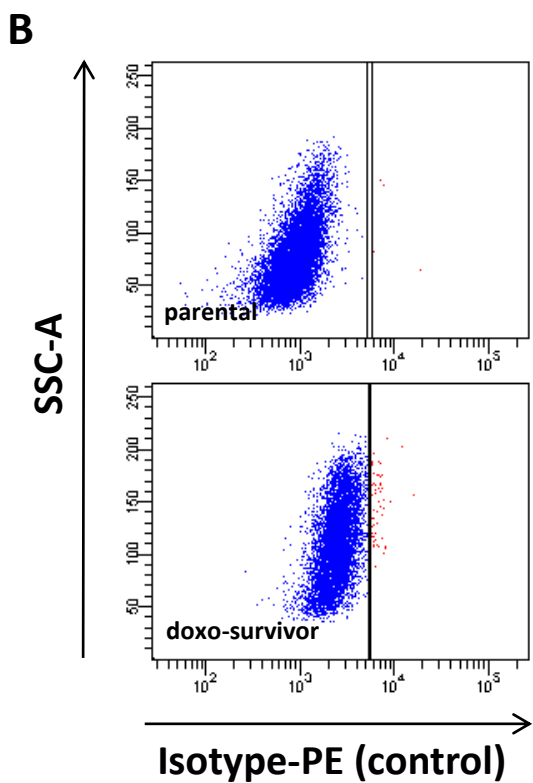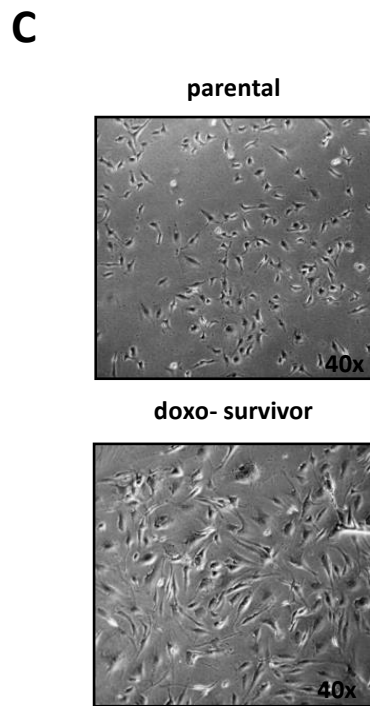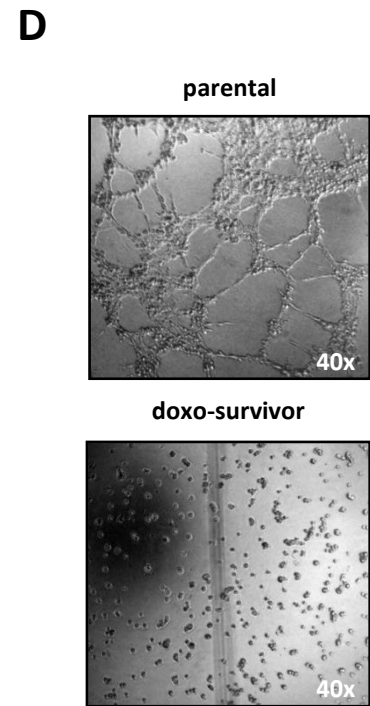

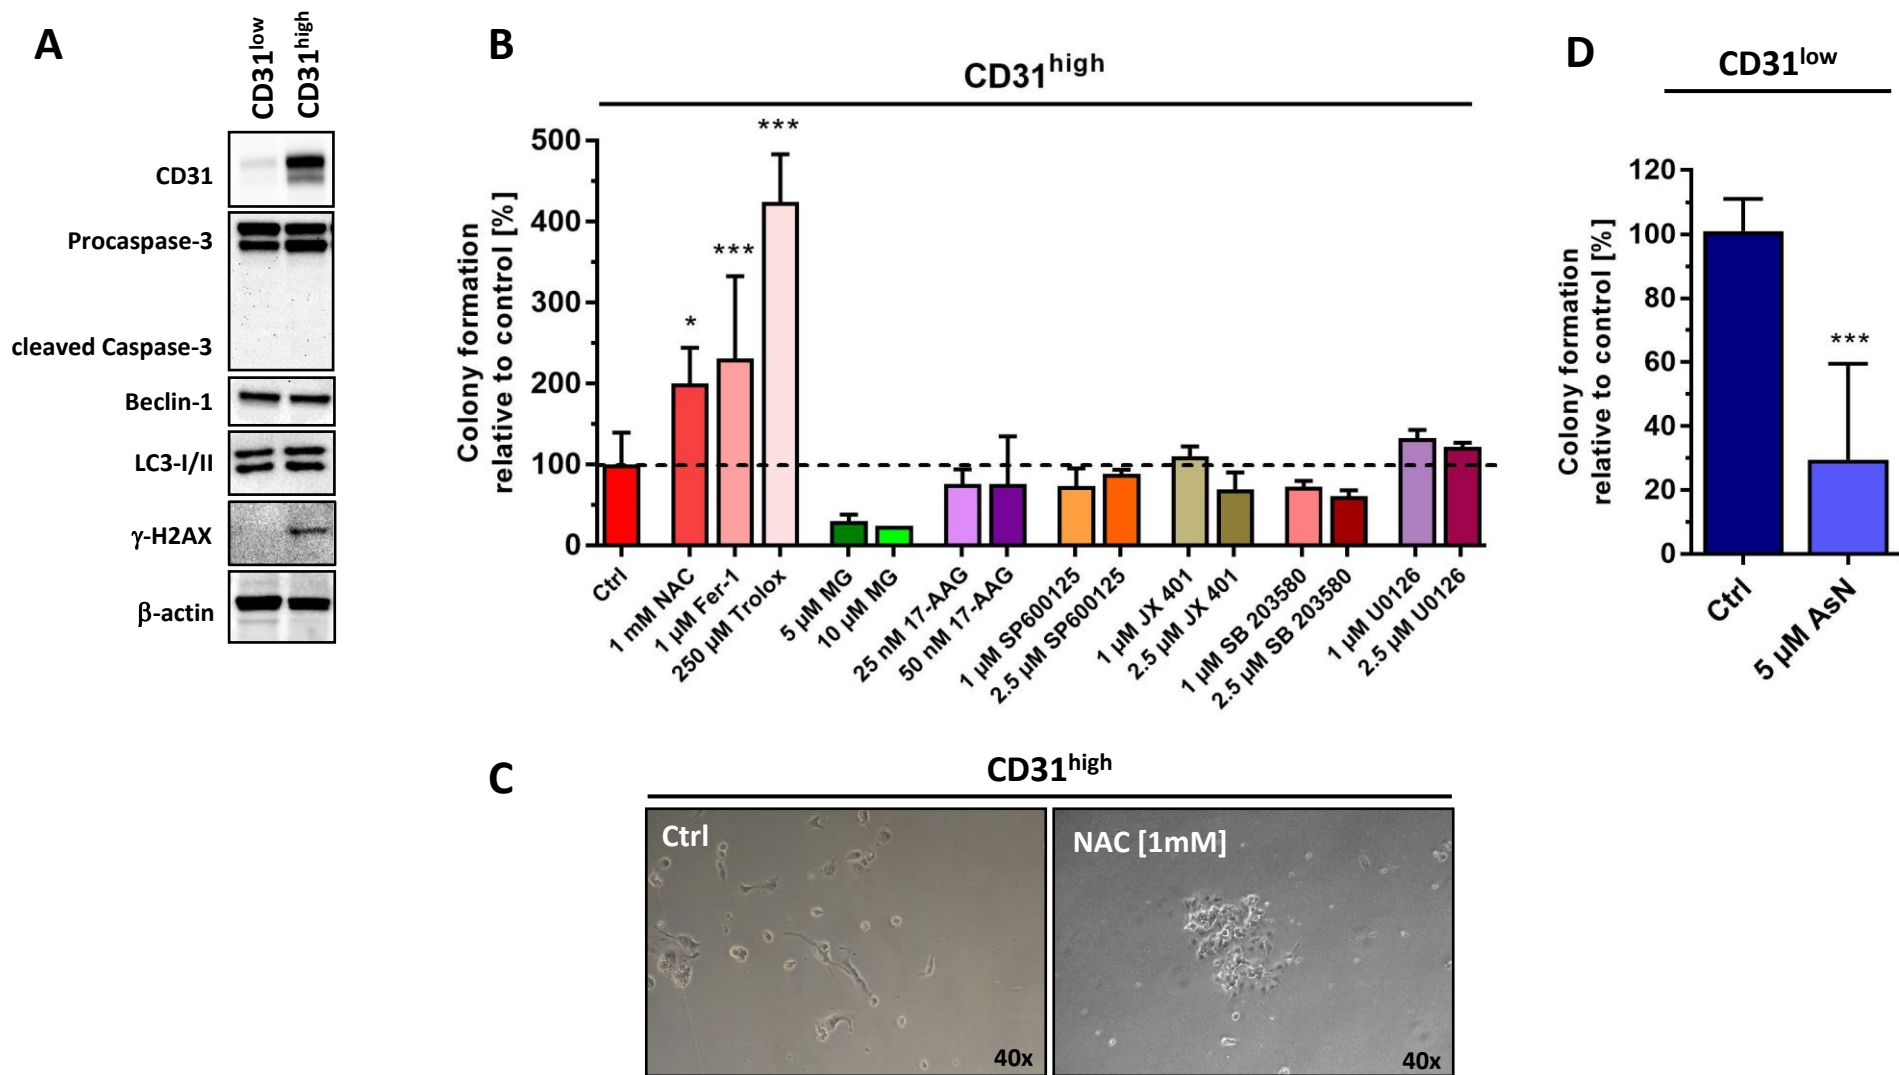

Supplemental Fig. 3

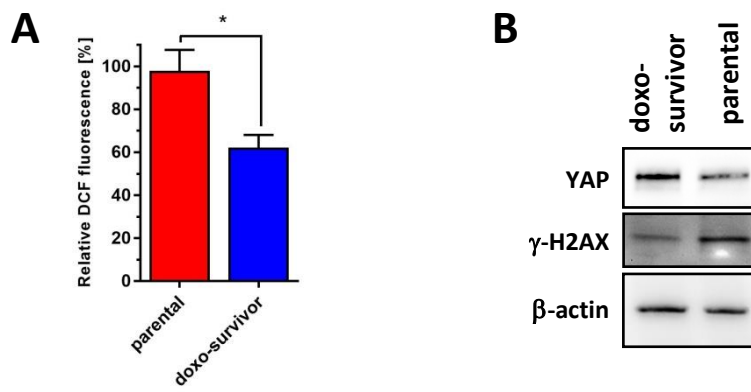

ISO-HASc.1

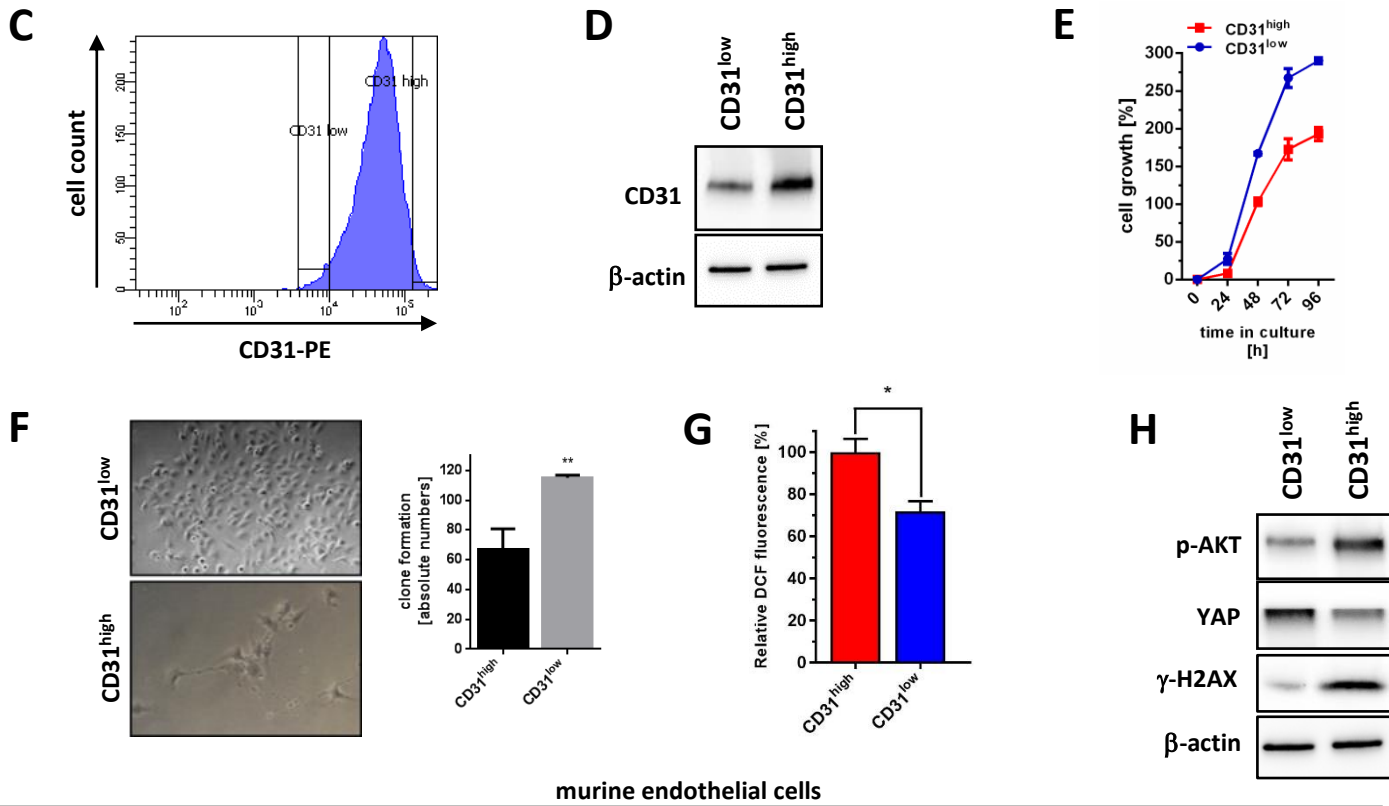

murine endothelial cells

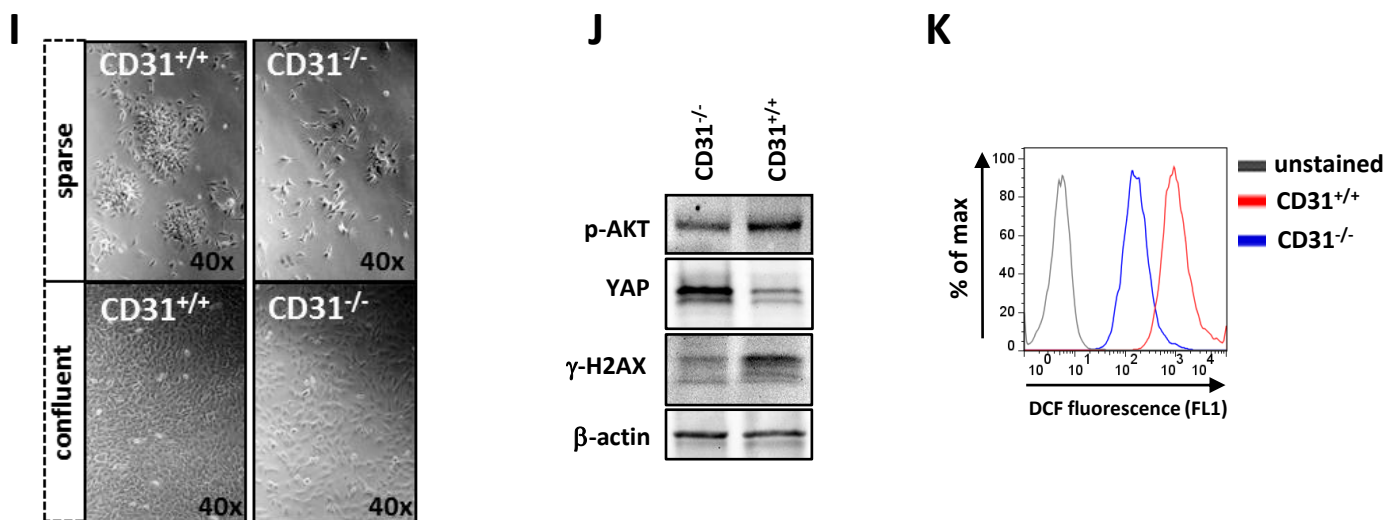

Supplementary Figure 4

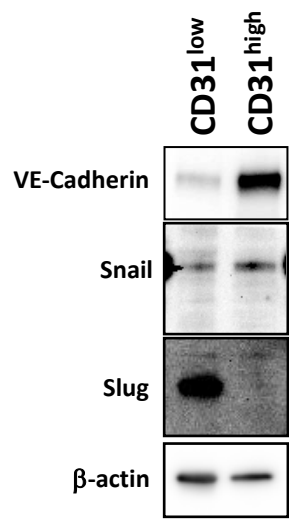

Supplement: NIHMS1608502-supplement-1.pdf [file NIHMS1608502-supplement-1.pdf]
