# Supplementary material
Source: PubMed Central journal article supplement (PMC7464789)
Supplement: NIHMS1608502-supplement-3.pdf [file NIHMS1608502-supplement-3.pdf]

**Supplementary Table 1: list of identified YAP/TAZ direct target genes**

| <b>Genesymbol</b> | <b>Genename</b>                             | <b>Reference</b> |
|-------------------|---------------------------------------------|------------------|
| <b>ABCB1</b>      | ATP Binding Cassette Subfamily B Member 1   | (1)              |
| <b>ANKRD</b>      | ankyrin repeat domain-containing protein    | (2)              |
| <b>CAT</b>        | catalase                                    | (3)              |
| <b>CTGF</b>       | connective tissue growth factor             | (4)              |
| <b>CYR61</b>      | Cysteine Rich Angiogenic Inducer 61         | (2)              |
| <b>GPATCH4</b>    | G-Patch Domain Containing 4                 | (5)              |
| <b>LMNB2</b>      | Lamin-B2                                    | (5)              |
| <b>PTGS2</b>      | Prostaglandin-endoperoxide synthase 2       | (6)              |
| <b>TXN</b>        | Thioredoxin                                 | (7)              |
| <b>WSB2</b>       | WD repeat and SOCS box-containing protein 2 | (5)              |

### References

1. Xia Y, Zhang YL, Yu C, Chang T, Fan HY. YAP/TEAD co-activator regulated pluripotency and chemoresistance in ovarian cancer initiated cells. *PLoS One*. 2014;9:e109575.
2. Choi HJ, Zhang H, Park H, Choi KS, Lee HW, Agrawal V, et al. Yes-associated protein regulates endothelial cell contact-mediated expression of angiopoietin-2. *Nature communications*. 2015;6:6943.
3. Shao D, Zhai P, Del Re DP, Sciarretta S, Yabuta N, Nojima H, et al. A functional interaction between Hippo-YAP signalling and FoxO1 mediates the oxidative stress response. *Nature communications*. 2014;5:3315.
4. Zhao B, Ye X, Yu J, Li L, Li W, Li S, et al. TEAD mediates YAP-dependent gene induction and growth control. *Genes Dev*. 2008;22:1962-71.
5. Zanconato F, Forcato M, Battilana G, Azzolin L, Quaranta E, Bodega B, et al. Genome-wide association between YAP/TAZ/TEAD and AP-1 at enhancers drives oncogenic growth. *Nat Cell Biol*. 2015;17:1218-27.
6. Basu-Roy U, Bayin NS, Rattanakorn K, Han E, Placantonakis DG, Mansukhani A, et al. Sox2 antagonizes the Hippo pathway to maintain stemness in cancer cells. *Nature communications*. 2015;6:6411.
7. Yuan T, Rafizadeh S, Azizi Z, Lypse B, Gorrepati KD, Awal S, et al. Proproliferative and antiapoptotic action of exogenously introduced YAP in pancreatic beta cells. *JCI insight*. 2016;1:e86326.
